# Supplementary material for: Combination of Acupoints in Treating Patients with Chronic Obstructive Pulmonary Disease: An Apriori Algorithm‐Based Association Rule Analysis
Source: Hindawi journal article supplement (doi:10.1155/2020/8165296), 2020-01-01
Supplement: f1 [file 8165296.f1.pdf]

**Supplementary Figure 1. Risk of bias assessment of the retrieved RCTs.**

**A**

|              | Bias arising from the randomization process | Bias due to deviations from intended interventions | Bias due to missing outcome | Bias in measurement of the outcome | Bias in selection of reported result | Overall bias |
|--------------|---------------------------------------------|----------------------------------------------------|-----------------------------|------------------------------------|--------------------------------------|--------------|
| Chu 2017     | ?                                           | +                                                  | +                           | +                                  | +                                    | +            |
| Deering 2011 | +                                           | +                                                  | +                           | +                                  | +                                    | +            |
| Fan 2011     | ?                                           | +                                                  | +                           | +                                  | +                                    | ?            |
| Gao 2011     | ?                                           | +                                                  | +                           | +                                  | +                                    | +            |
| Jia 2004     | ?                                           | +                                                  | +                           | +                                  | +                                    | +            |
| Lee 2015     | +                                           | +                                                  | +                           | +                                  | +                                    | +            |
| Lee 2017     | ?                                           | +                                                  | +                           | +                                  | +                                    | ?            |
| Liu 2015     | ?                                           | +                                                  | +                           | +                                  | +                                    | +            |
| Shi 2017     | +                                           | +                                                  | +                           | +                                  | +                                    | +            |
| Suzuki 2012  | +                                           | +                                                  | +                           | +                                  | +                                    | +            |
| Xie 2014     | ?                                           | +                                                  | +                           | +                                  | +                                    | ?            |
| Yang 2016    | +                                           | +                                                  | +                           | +                                  | +                                    | +            |
| Yu 2014      | +                                           | +                                                  | +                           | +                                  | +                                    | +            |

**B**

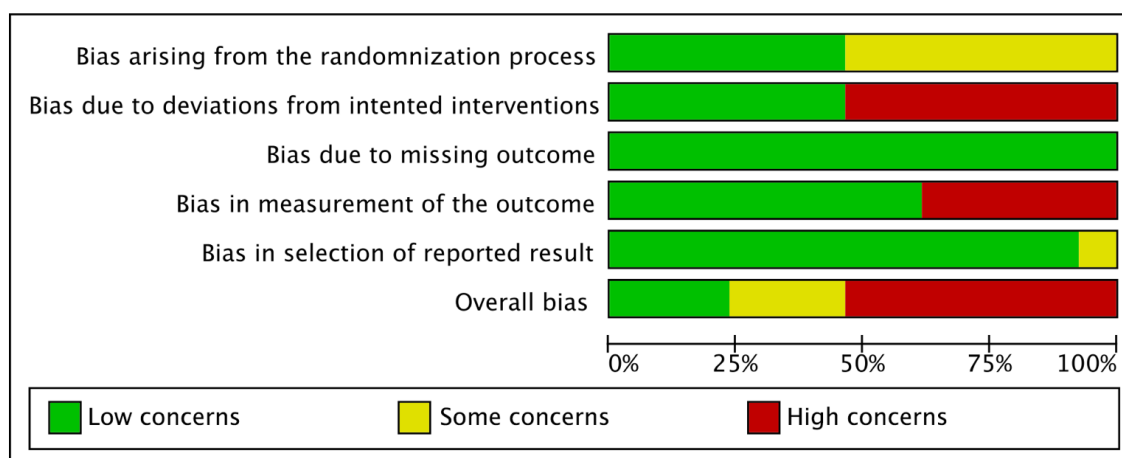

Supplementary Table 1. Binary data of acupoints extracted from 12 RCT studies

| Study                 | BL12 | BL13 | BL15 | BL17 | BL20 | BL23 | BL43 | CV12 | CV17 | CV22 | CV4 | CV6 | EXB1 | GV14 | GV20 | KI3 | LI10 | LI11 | LI6 | LU5 | LU7 | LU9 | SP10 | ST36 | ST40 | TE10 | TE6 |
|-----------------------|------|------|------|------|------|------|------|------|------|------|-----|-----|------|------|------|-----|------|------|-----|-----|-----|-----|------|------|------|------|-----|
| Jia (2004)            | 0    | 1    | 0    | 0    | 0    | 1    | 1    | 0    | 1    | 0    | 0   | 0   | 1    | 0    | 0    | 1   | 0    | 0    | 0   | 1   | 1   | 1   | 0    | 1    | 0    | 0    | 0   |
| Deering et al. (2011) | 0    | 0    | 0    | 0    | 0    | 0    | 0    | 0    | 0    | 0    | 0   | 0   | 0    | 0    | 0    | 0   | 1    | 1    | 0   | 1   | 1   | 0   | 0    | 0    | 0    | 1    | 1   |
| Fan et al. (2011)     | 1    | 1    | 1    | 0    | 1    | 1    | 1    | 0    | 1    | 1    | 0   | 0   | 1    | 0    | 0    | 0   | 0    | 0    | 0   | 0   | 0   | 0   | 0    | 1    | 0    | 0    | 0   |
| Gao et al. (2011)     | 1    | 1    | 1    | 0    | 1    | 1    | 1    | 0    | 1    | 1    | 0   | 0   | 1    | 1    | 0    | 0   | 0    | 0    | 0   | 0   | 0   | 0   | 0    | 1    | 0    | 0    | 0   |
| Xie et al. (2014)     | 1    | 1    | 1    | 0    | 0    | 0    | 1    | 0    | 0    | 0    | 0   | 0   | 1    | 1    | 0    | 0   | 0    | 0    | 0   | 0   | 0   | 0   | 0    | 1    | 0    | 0    | 0   |
| Yu (2014)             | 1    | 1    | 0    | 0    | 0    | 1    | 1    | 0    | 1    | 0    | 0   | 0   | 1    | 0    | 0    | 0   | 0    | 0    | 0   | 1   | 1   | 0   | 1    | 1    | 1    | 0    | 0   |
| Lee et al. (2015)     | 0    | 1    | 0    | 1    | 1    | 1    | 0    | 0    | 0    | 0    | 0   | 0   | 0    | 1    | 0    | 0   | 0    | 0    | 0   | 0   | 0   | 0   | 0    | 0    | 0    | 0    | 0   |
| Liu et al. (2015)     | 0    | 1    | 0    | 0    | 0    | 1    | 0    | 0    | 1    | 0    | 1   | 1   | 1    | 0    | 0    | 0   | 0    | 0    | 0   | 0   | 0   | 0   | 0    | 1    | 0    | 0    | 0   |
| Yang et al. (2016)    | 0    | 1    | 0    | 1    | 1    | 1    | 0    | 0    | 0    | 0    | 0   | 0   | 0    | 1    | 0    | 0   | 0    | 0    | 0   | 0   | 0   | 0   | 0    | 0    | 0    | 0    | 0   |
| Chu (2017)            | 1    | 1    | 0    | 0    | 0    | 1    | 1    | 0    | 1    | 0    | 0   | 0   | 1    | 0    | 0    | 0   | 0    | 0    | 0   | 1   | 1   | 0   | 1    | 1    | 1    | 0    | 0   |
| Lee (2017)            | 1    | 1    | 0    | 0    | 0    | 1    | 1    | 0    | 1    | 0    | 0   | 0   | 1    | 0    | 0    | 0   | 0    | 0    | 0   | 1   | 0   | 0   | 1    | 1    | 1    | 0    | 0   |
| Shi et al. (2017)     | 0    | 0    | 0    | 0    | 0    | 0    | 0    | 1    | 1    | 0    | 0   | 1   | 0    | 0    | 1    | 0   | 0    | 0    | 1   | 0   | 1   | 1   | 0    | 1    | 0    | 0    | 0   |
